# Supplementary material for: Solvation/desolvation induced reversible distortion change and switching between spin crossover and single molecular magnet behaviour in a cobalt(ii) complex
Source: Royal Society of Chemistry journal article supplement (doi:10.1039/d3dt03936f), 2024-01-01
Supplement: d3dt03936f1.pdf [file d3dt03936f1.pdf]

# Solvation/Desolvation Induced Reversible Distortion Change and Switching between Spin Crossover and Single Molecular Magnet Behaviour in a Cobalt(II) Complex

*Hikaru Zenno,<sup>a</sup> Yoshihiro Sekine,<sup>a,b</sup> Zhongyue Zhang,<sup>a,c</sup> and Shinya Hayami<sup>\*a,d</sup>*

<sup>a</sup> Department of Chemistry, Graduate School of Science and Technology, Kumamoto University,  
2-39-1 Kurokami, Chuo-ku, Kumamoto 860-8555 Japan.

<sup>b</sup> *Priority Organization for Innovation and Excellence, Kumamoto University, 2-39-1 Kurokami,  
Chuo-ku, Kumamoto 860-8555, Japan.*

<sup>c</sup> *International Research Organization for Advanced Science and Technology, Kumamoto  
University, 2-39-1 Kurokami, Chuo-ku, Kumamoto 860-8555, Japan.*

<sup>d</sup> *Institute of Industrial Nanomaterials (IINa), Kumamoto University, 2-39-1 Kurokami, Chuo-ku,  
Kumamoto 860-8555, Japan.*

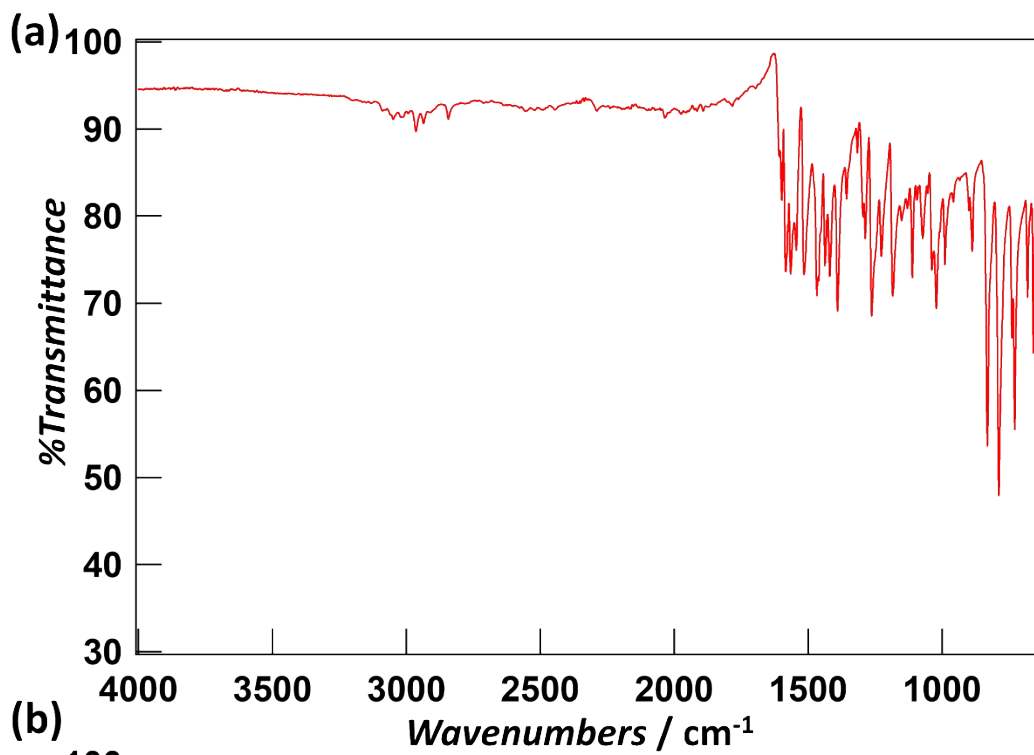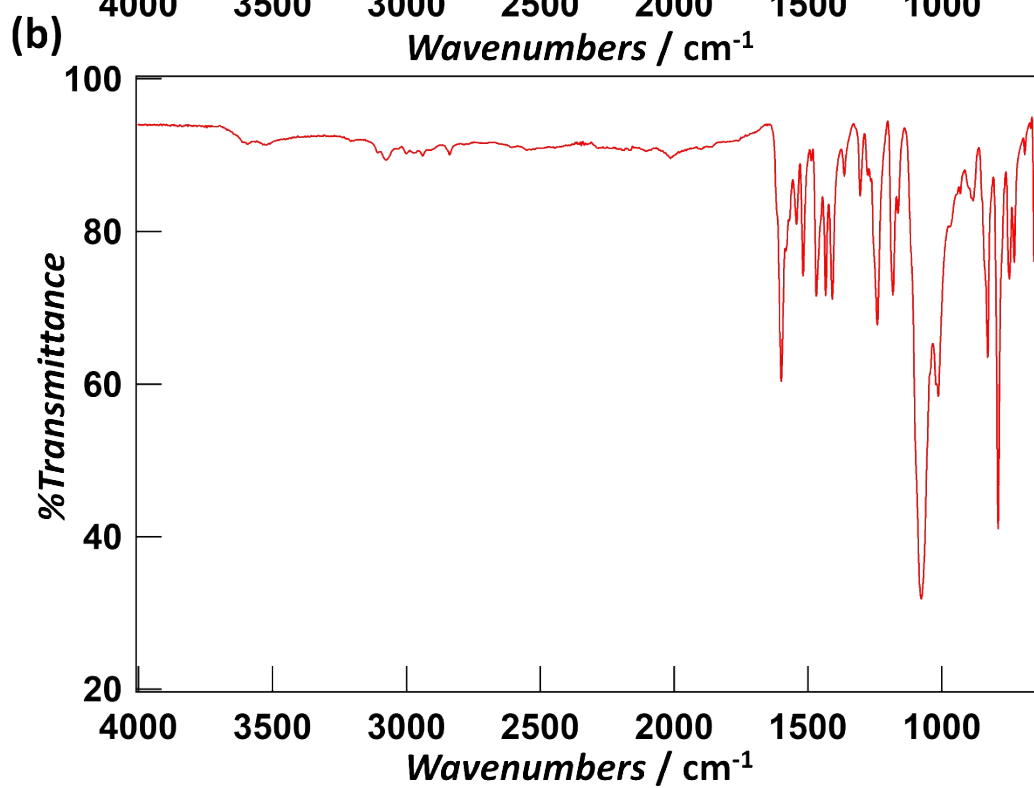

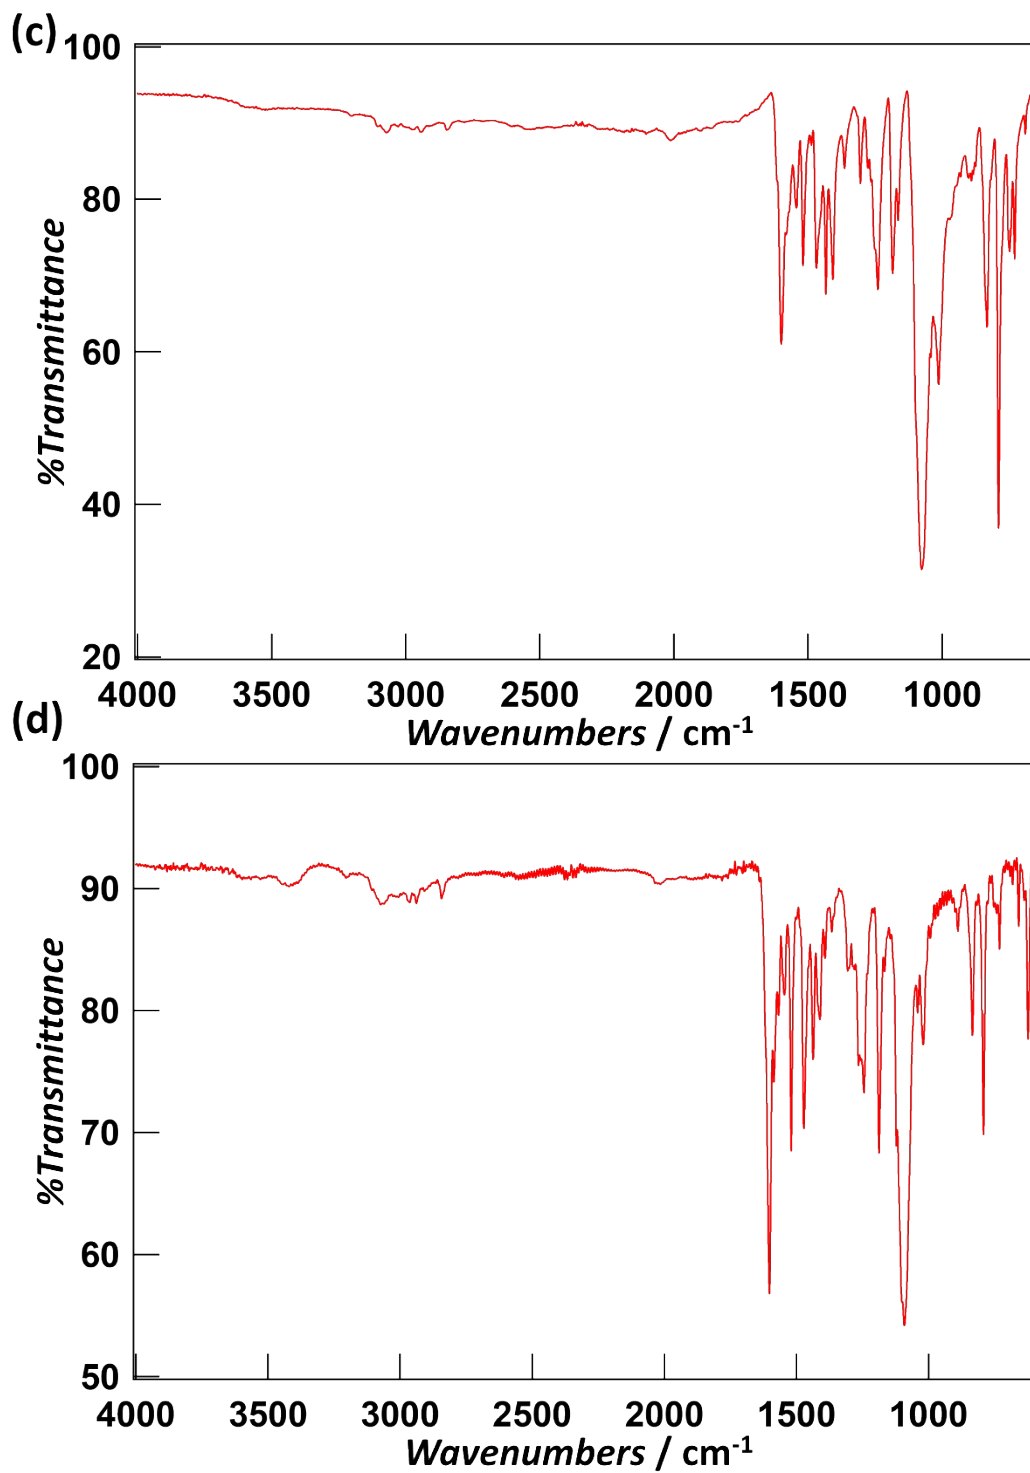

Fig. S1 FT-IR spectra for (a) MeOphterpy, (b) 1·1.5MeOH, (c) 1 and (d) 1·1.5MeOH'

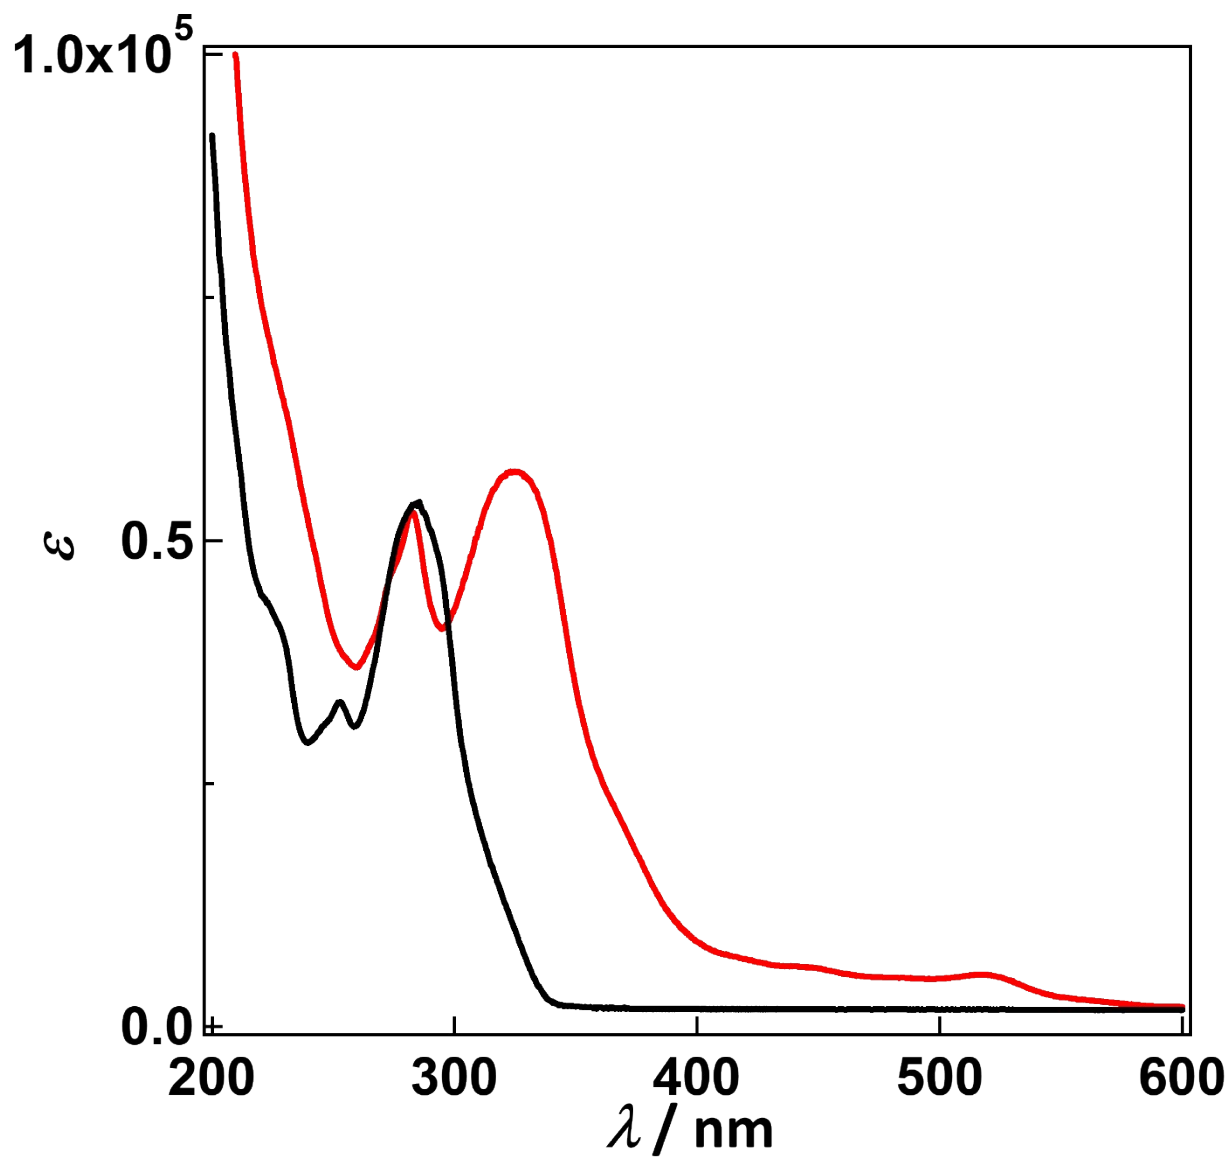

**Fig. S2** UV-VIS spectra for acetonitrile solutions of MeOphterpy (back solid line) and **1**(red solid line)

**Table. S1.** Crystallographic parameters

| Compound                   | <b>1</b> ·1.5MeOH                                                                    |            | <b>1</b>                                                                         |             |
|----------------------------|--------------------------------------------------------------------------------------|------------|----------------------------------------------------------------------------------|-------------|
| Formula                    | C <sub>45.5</sub> H <sub>40</sub> Cl <sub>2</sub> CoN <sub>6</sub> O <sub>11.5</sub> |            | C <sub>44</sub> H <sub>34</sub> Cl <sub>2</sub> CoN <sub>6</sub> O <sub>10</sub> |             |
| Temperature (K)            | 110                                                                                  | 273        | 110                                                                              | 300         |
| Crystal system             | Monoclinic                                                                           |            |                                                                                  |             |
| Space group                | P2 <sub>1</sub> /c                                                                   |            |                                                                                  |             |
| <i>a</i> (Å)               | 18.5673(4)                                                                           | 18.8486(9) | 17.9066(10)                                                                      | 17.9555(15) |
| <i>b</i> (Å)               | 14.9013(3)                                                                           | 15.2034(7) | 15.2903(5)                                                                       | 15.5934(11) |
| <i>c</i> (Å)               | 16.1628(3)                                                                           | 16.2749(8) | 16.1139(7)                                                                       | 16.1013(13) |
| $\alpha$ (°)               | 90.0000                                                                              | 90.0000    | 90.0000                                                                          | 90.0000     |
| $\beta$ (°)                | 104.196(2)                                                                           | 104.515(5) | 112.673(6)                                                                       | 110.289(9)  |
| $\gamma$ (°)               | 90.0000                                                                              | 90.0000    | 90.0000                                                                          | 90.0000     |
| <i>V</i> (Å <sup>3</sup> ) | 4335.31(16)                                                                          | 4514.9(4)  | 4071.0(4)                                                                        | 4228.5(6)   |
| <i>Z</i>                   | 4                                                                                    | 4          | 4                                                                                | 4           |
| R1                         | 0.0433                                                                               | 0.0611     | 0.0577                                                                           | 0.0849      |
| <i>w</i> R2                | 0.1163                                                                               | 0.1469     | 0.1284                                                                           | 0.2106      |
| R1(all)                    | 0.0568                                                                               | 0.1218     | 0.0961                                                                           | 0.1723      |
| <i>w</i> R2(all)           | 0.1225                                                                               | 0.1678     | 0.1435                                                                           | 0.2540      |
| CCDC                       | 2289952                                                                              | 2289953    | 2289954                                                                          | 2289955     |

**Table S2.** Representative bond distances (Å) around cobalt(II) centers

| Compound | 1·1.5MeOH |          | 1        |          |
|----------|-----------|----------|----------|----------|
|          | 110       | 273      | 110      | 300      |
| Co-N1    | 2.067(2)  | 2.109(3) | 2.152(3) | 2.145(5) |
| Co-N2    | 1.891(2)  | 1.954(3) | 2.065(3) | 2.053(5) |
| Co-N3    | 2.054(2)  | 2.095(3) | 2.163(3) | 2.157(4) |
| Co-N4    | 2.097(2)  | 2.115(3) | 2.136(3) | 2.148(5) |
| Co-N5    | 1.910(2)  | 1.966(3) | 2.065(3) | 2.068(5) |
| Co-N6    | 2.100(2)  | 2.122(3) | 2.144(3) | 2.164(5) |

**Table S3.** Bond angles (°) and distortion  $\Sigma$  values (°) around cobalt(II) centers

| Compound     | <b>1</b> ·1.5MeOH |            | <b>1</b>   |            |
|--------------|-------------------|------------|------------|------------|
|              | 110               | 273        | 110        | 300        |
| N(1)-Co-N(2) | 79.88(8)          | 78.37(11)  | 76.48(11)  | 76.30(18)  |
| N(1)Co-N(4)  | 91.66(7)          | 92.27(11)  | 96.11(11)  | 96.08(17)  |
| N(1)-Co-N(5) | 98.69(8)          | 99.60(12)  | 94.83(11)  | 96.69(18)  |
| N(1)-Co-N(6) | 96.56(8)          | 97.48(12)  | 94.37(11)  | 94.64(19)  |
| N(2)-Co-N(3) | 80.08(8)          | 78.29(12)  | 75.10(12)  | 75.10(17)  |
| N(2)-Co-N(4) | 101.53(8)         | 103.33(11) | 105.53(11) | 105.50(17) |
| N(2)-Co-N(6) | 99.74(8)          | 100.60(12) | 104.42(11) | 104.19(19) |
| N(3)-Co-N(4) | 91.29(8)          | 90.84(11)  | 91.87(11)  | 91.51(16)  |
| N(3)-Co-N(5) | 101.36(8)         | 103.79(11) | 113.59(12) | 111.91(18) |
| N(3)-Co-N(6) | 87.86(8)          | 89.06(12)  | 92.22(11)  | 92.31(18)  |
| N(4)-Co-N(5) | 79.23(8)          | 78.13(11)  | 75.61(11)  | 75.39(17)  |
| N(5)-Co-N(6) | 79.62(8)          | 78.14(12)  | 75.35(11)  | 75.63(18)  |
| $\Sigma$ (°) | 94.16             | 105.92     | 130.40     | 130.41     |

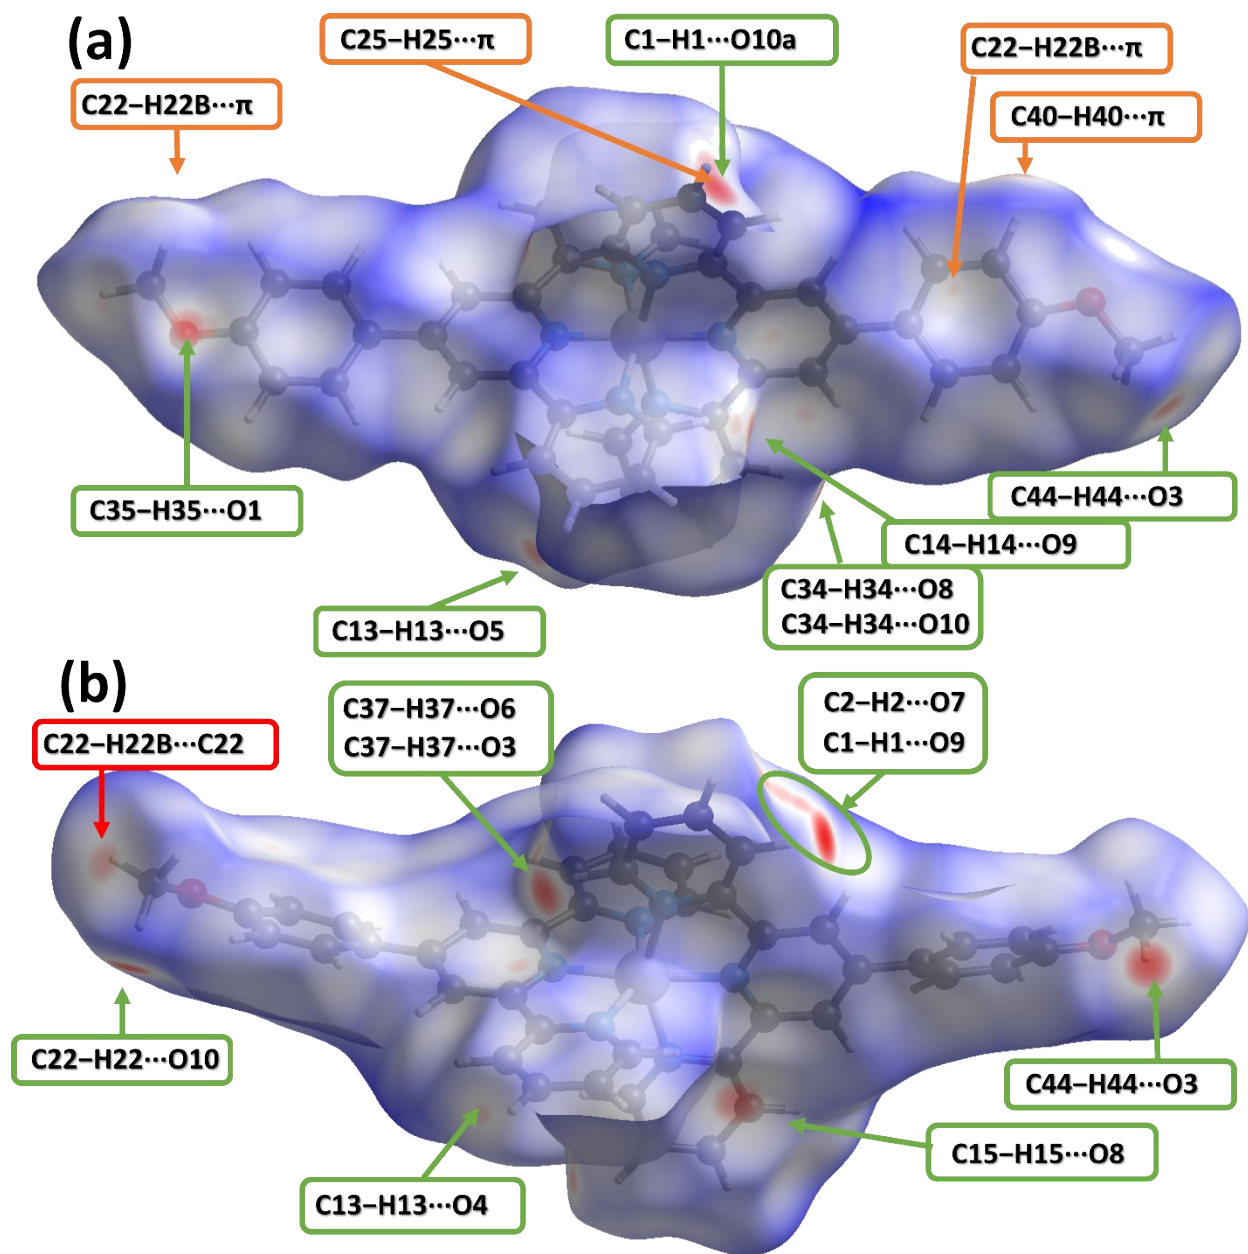

**Fig. S3** Hirshfeld surface for (a) **1**·1.5MeOH and (b) **1** mapped with  $d_{\text{norm}}$  in the range from  $-0.1734$  to  $1.5686$  a.u. The red dots indicate intermolecular contacts occurring due to shorter distances than the sum of the van der Waals radii. Green enclosure lines indicate hydrogen bonds between  $[\text{Co}(\text{MeOphterpy})_2]^{2+}$  cations and perchlorate anions. Orange enclosure lines indicate C-H... $\pi$  interactions. Red enclosure lines indicate intermolecular interactions between adjacent  $[\text{Co}(\text{MeOphterpy})_2]^{2+}$  cations



**Table S4.** Selected intermolecular separations (Å) for **1**·1.5MeOH and **1** at 110K

| <b>1</b> ·1.5MeOH                                                                                |       | <b>1</b>                                                                                      |        |
|--------------------------------------------------------------------------------------------------|-------|-----------------------------------------------------------------------------------------------|--------|
| [Co(MeOphterpy) <sub>2</sub> ] <sup>2+</sup> ···ClO <sub>4</sub> <sup>-</sup>                    |       | [Co(MeOphterpy) <sub>2</sub> ] <sup>2+</sup> ···ClO <sub>4</sub> <sup>-</sup>                 |        |
| C1–H1···O10a                                                                                     | 2.914 | C1–H1···O9                                                                                    | 3.204  |
| C3–H3···O6                                                                                       | 3.374 | C2–H2···O7                                                                                    | 3.209  |
| C13–H13···O5                                                                                     | 3.435 | C3–H3···O3                                                                                    | 3.191  |
| C14–H14···O9                                                                                     | 3.316 | C13–H13···O5                                                                                  | 3.526  |
| C34–H34···O8                                                                                     | 3.395 | C15–H15···O8                                                                                  | 3.345  |
| C34–H34···O8a                                                                                    | 3.470 | C22–H22···O10                                                                                 | 3.369  |
| C34–H34···O10                                                                                    | 3.207 | C34–H34···O8                                                                                  | 3.248  |
| C37–H37···O3                                                                                     | 3.216 | C35–H35···O10                                                                                 | 3.103  |
| C44–H44B···O3                                                                                    | 3.041 | C37–H37···O3                                                                                  | 3.101  |
| [Co(MeOphterpy) <sub>2</sub> ] <sup>2+</sup> ···<br>[Co(MeOphterpy) <sub>2</sub> ] <sup>2+</sup> |       | C37–H37···O6                                                                                  | 3.352  |
| C22–H22···<br>$\pi$ (C(38–43))                                                                   | 3.675 | C44–H44···O5                                                                                  | 3.267  |
| C25–H25···<br>$\pi$ (C(38–43))                                                                   | 3.387 | [Co(MeOphterpy) <sub>2</sub> ] <sup>2+</sup> ··· [Co(MeOphterpy) <sub>2</sub> ] <sup>2+</sup> |        |
| C40–H40···<br>$\pi$ (N6C(33–37))                                                                 | 4.080 | C22–H22B···C22                                                                                | 3.3235 |
| C35–H35···O1                                                                                     | 3.491 |                                                                                               |        |
| <b><math>\pi</math>–<math>\pi</math> interaction</b>                                             |       |                                                                                               |        |
| $\pi$ (C(1–5)N1)···<br>$\pi$ (C(11–15)N3)                                                        | 4.001 | $\pi$ (C(1–5)N1)···<br>$\pi$ (C(11–15)N(3))                                                   | 3.756  |
| $\pi$ (C(1–5)N1)···<br>$\pi$ (C(16–21))                                                          | 3.819 | $\pi$ (C(1–5)N1)···<br>$\pi$ (C(16–21))                                                       | 3.820  |

CH··· $\pi$  is the distance between CH and the centroid of pyridine and benzene rings.

$\pi$ ··· $\pi$  is the distance between centroids of pyridine and benzene rings.

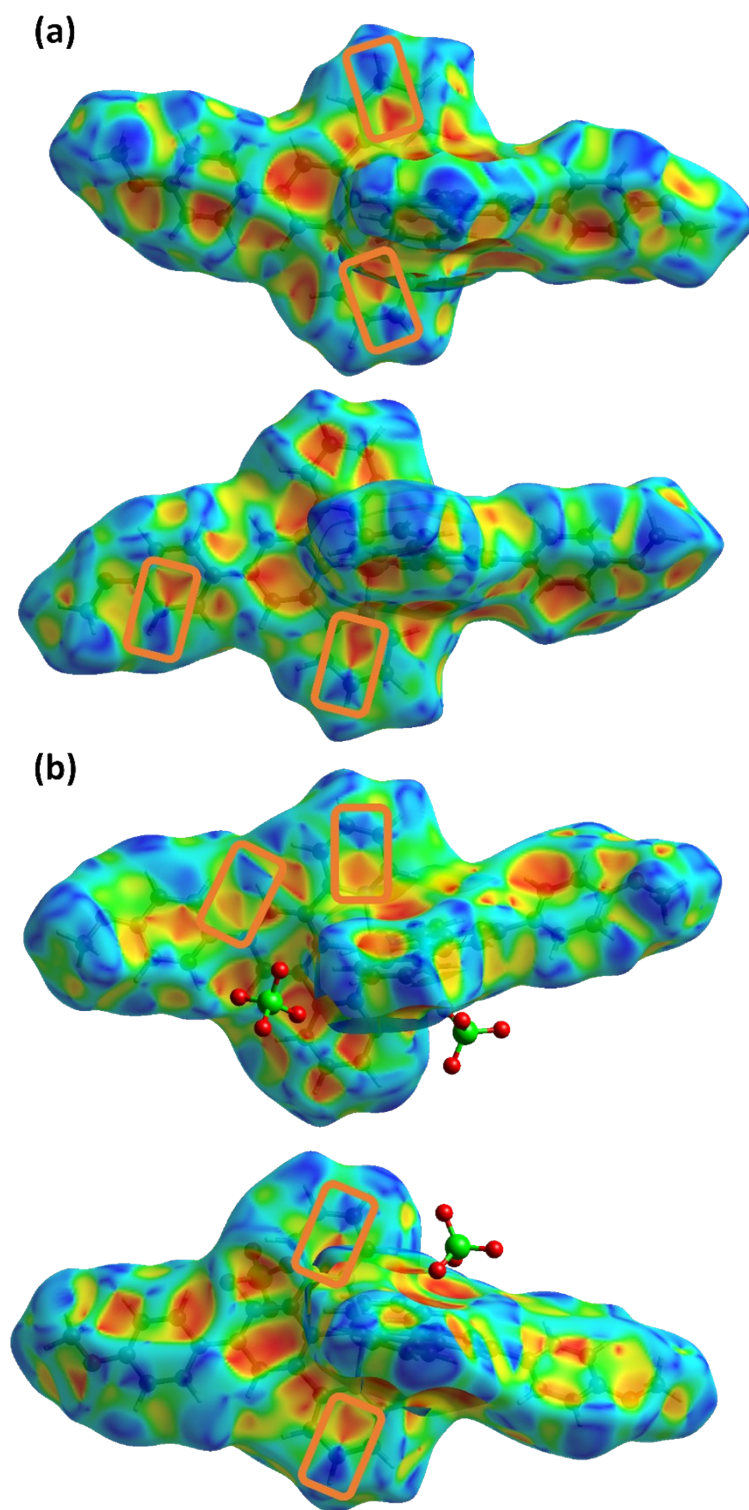

**Figure S4.** Hirshfeld surface for (a) **1**·1.5MeOH and (b) **1** mapped with shape index. The adjacent red and blue triangles and the orange enclosure lines indicate the  $\pi$ - $\pi$  interactions

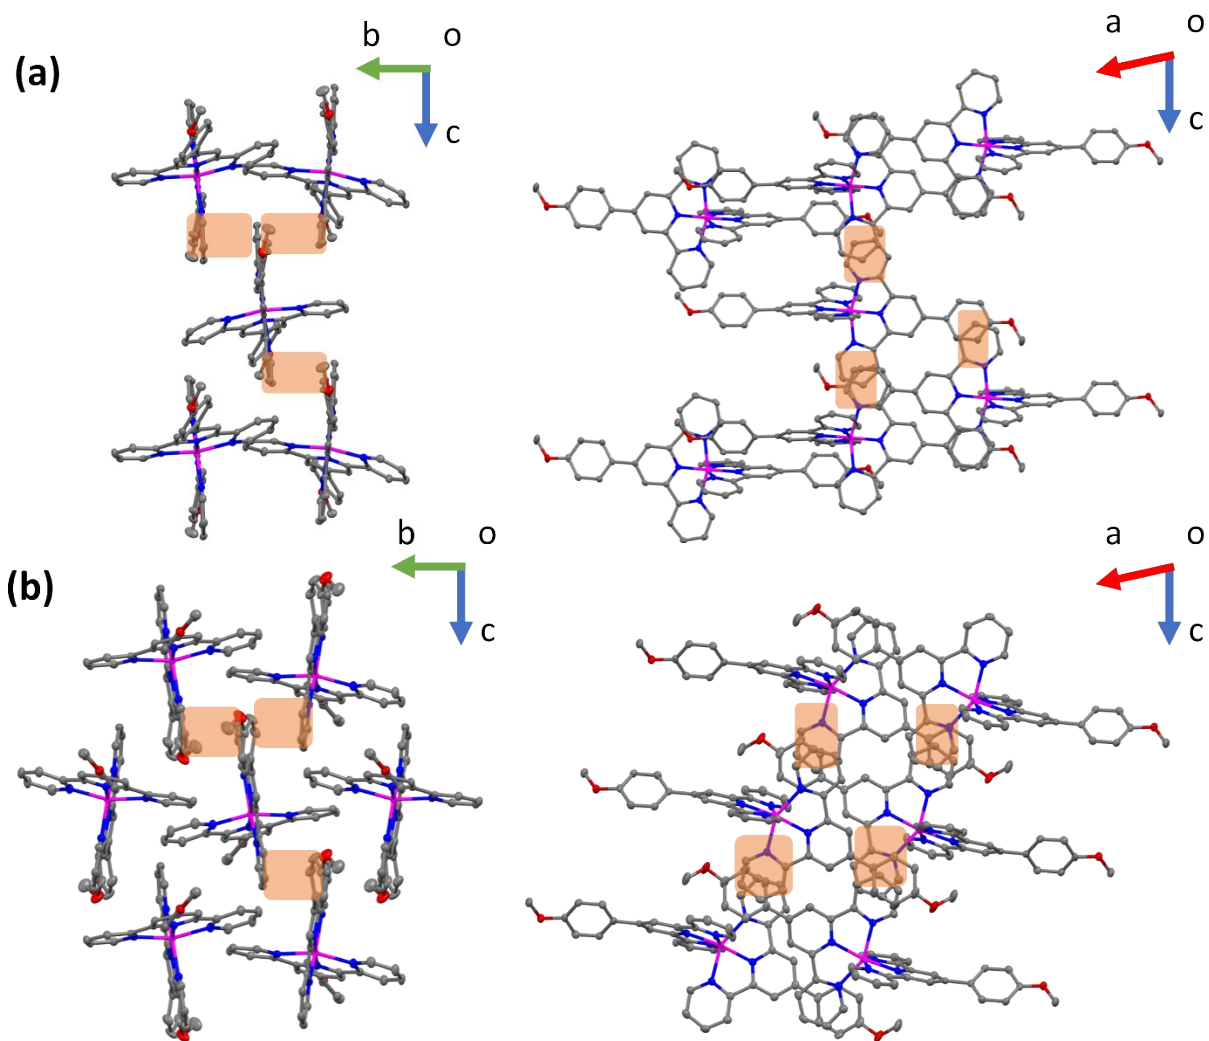

**Figure S5.**  $\pi$ - $\pi$  interactions in packing structures for (a) **1**·1.5MeOH and (b) **1**

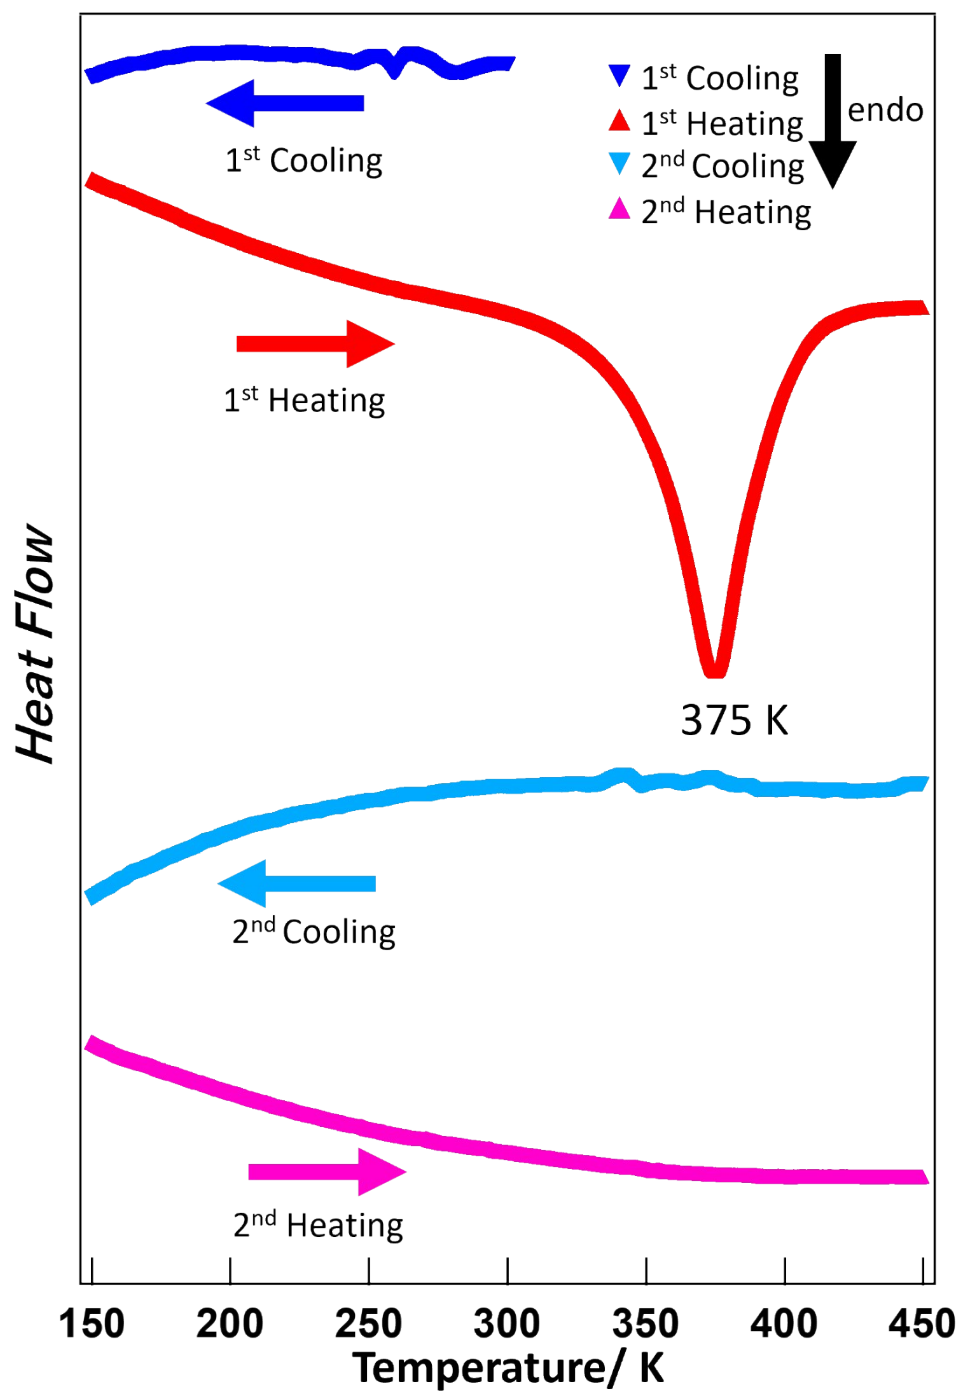

**Figure S6.** DSC curves for **1**·1.5MeOH in the range 150–450 K at 10 K min<sup>-1</sup> (blue: 1<sup>st</sup> cooling process, red: 1<sup>st</sup> heating process, light blue: 2<sup>nd</sup> cooling process, and pink: 2<sup>nd</sup> Heating process)

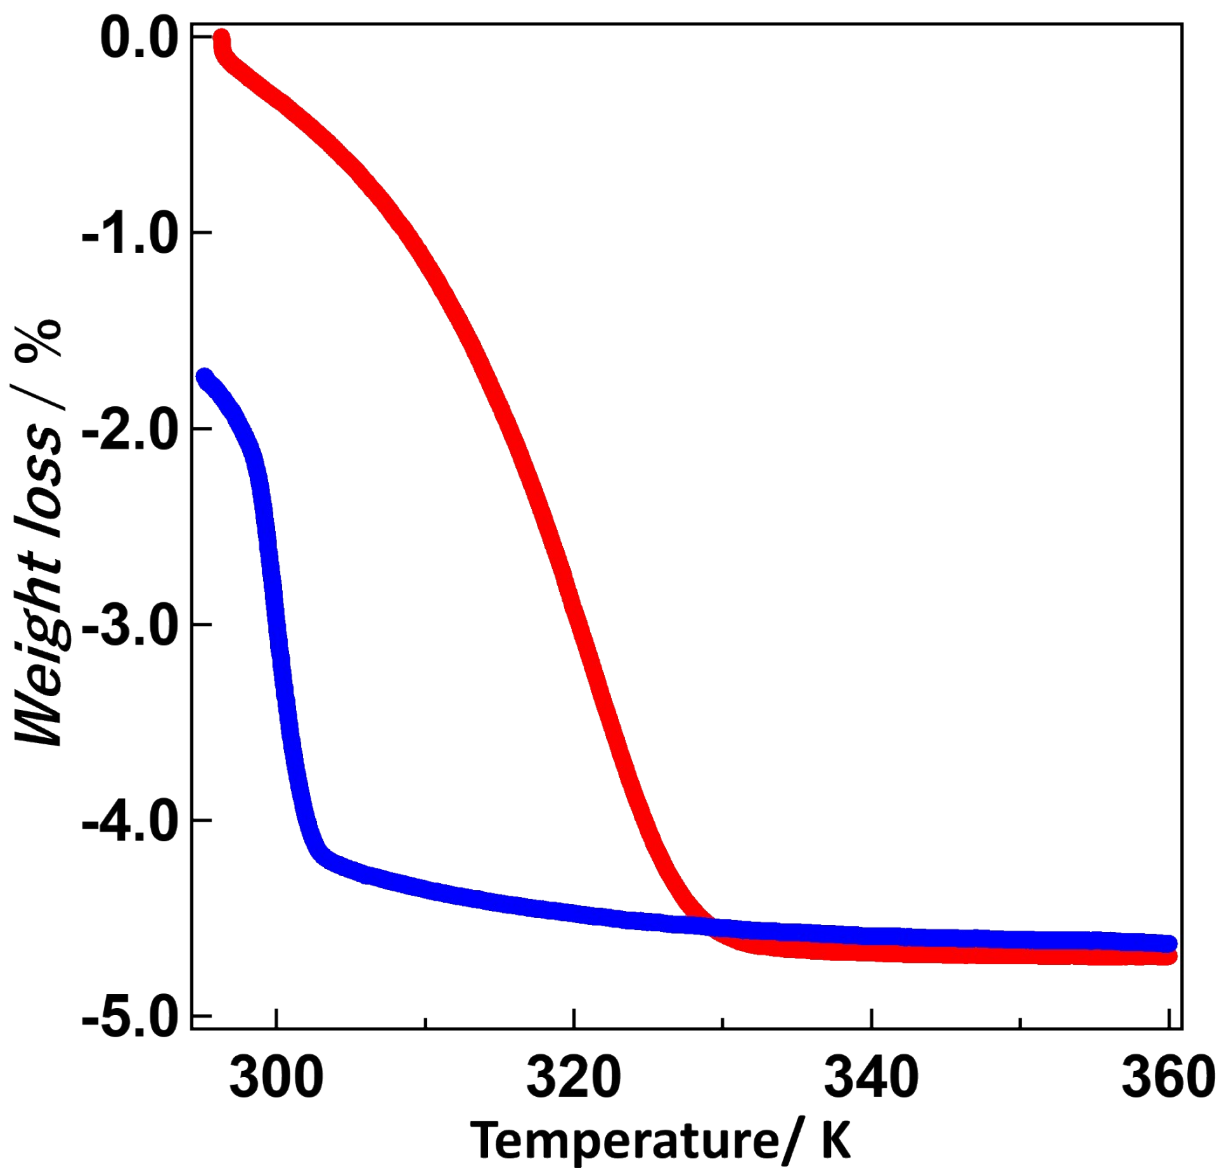

**Fig. S7.** Thermogravimetric analysis (TGA) for 1·1.5MeOH. The red line is heating, and the blue line is cooling. In the heating range, 1·1.5MeOH revealed *ca* 4.7% weight loss in the 300 K-360 K, corresponding to the removal of 1.5MeOH molecules (calc.4.8%). This compound re-absorbed H<sub>2</sub>O in the atmosphere under the 300 K-360 K cooling range

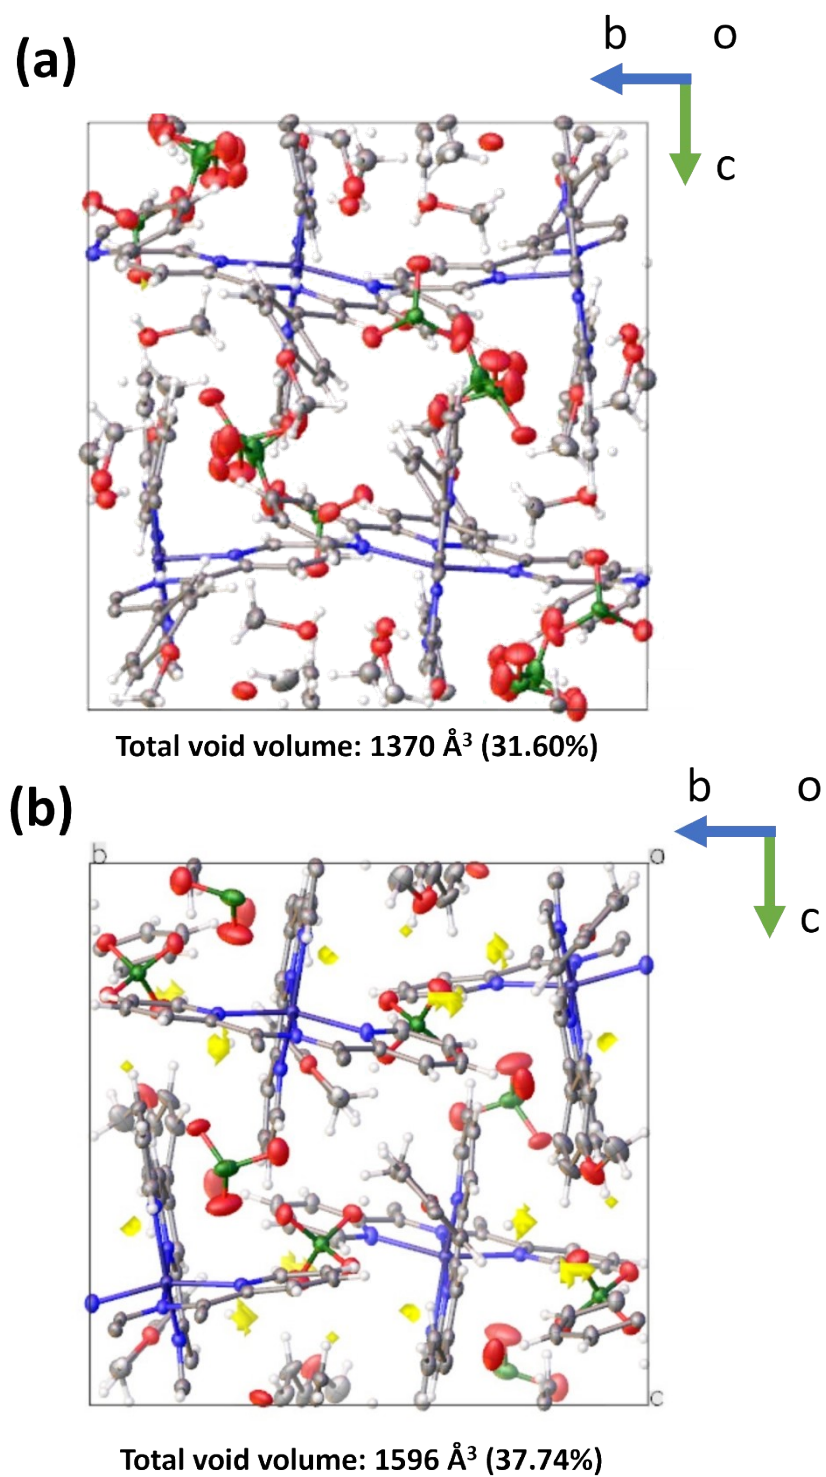

**Fig. S8.** Single crystal void volumes for (a) 1·1.5MeOH, (b) 1 at 110 K. Yellow “fog” represents the voids

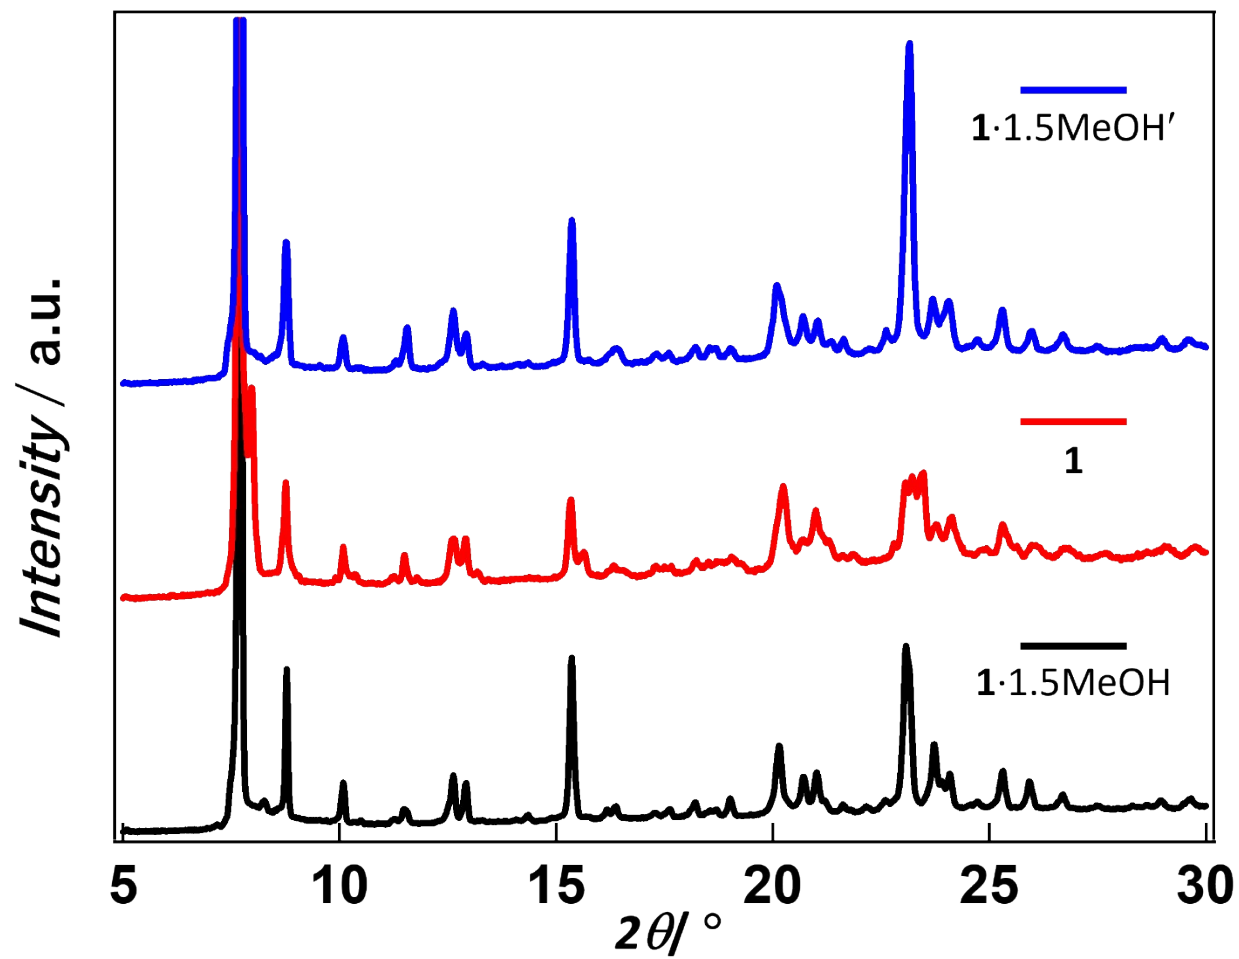

Fig. S9. PXRD patterns for 1·1.5MeOH (black), 1 (red), and 1·1.5MeOH' (blue) at 300 K

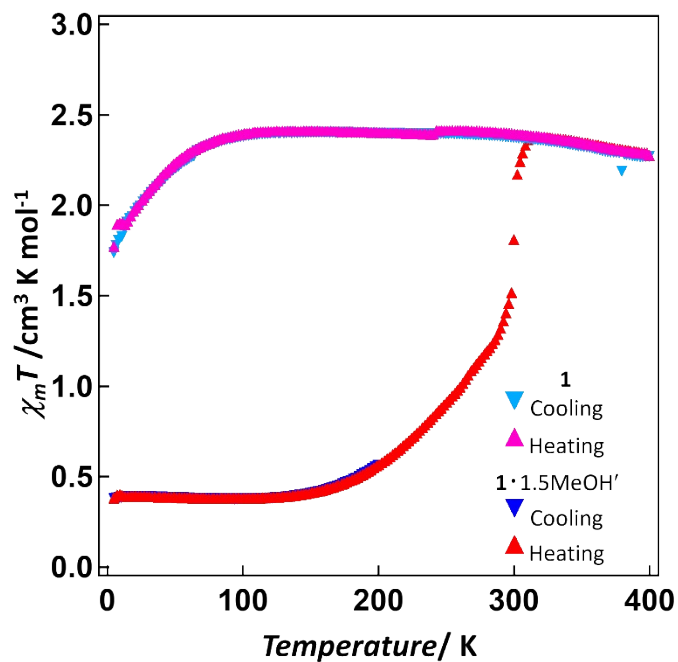

**Figure S10.**  $\chi_m T$  versus  $T$  plots for **1**, **1·1.5MeOH'** in the range 2–400 K ( $\blacktriangle$ : heating mode, pink:**1**, red: **1·1.5MeOH'**,  $\blacktriangledown$ : cooling mode, light blue:**1**, blue: **1·1.5MeOH'**), where  $\chi_m T$  is the molar magnetic susceptibility, and  $T$  is the temperature

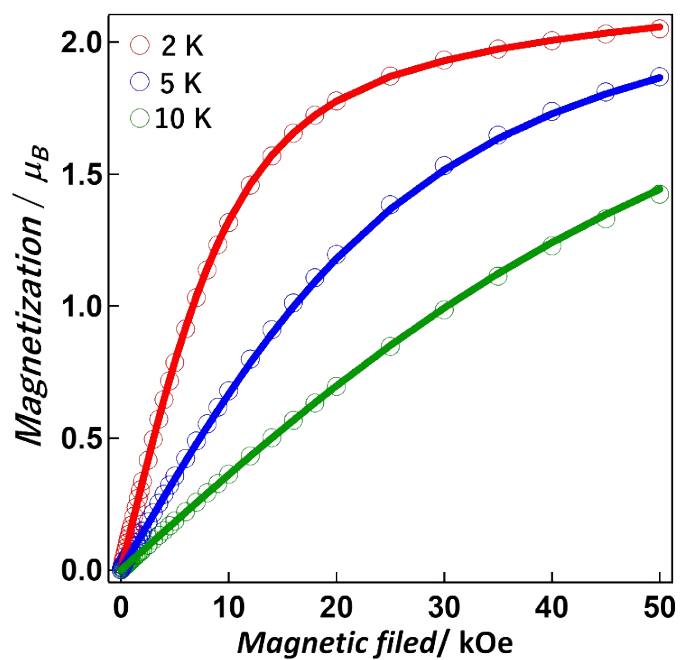

**Figure S11.**  $M$  versus  $H$  plots for **1**. The plots show the experimental values (red: 2 K, blue: 5 K, green: 10 K, solid line: fitting)



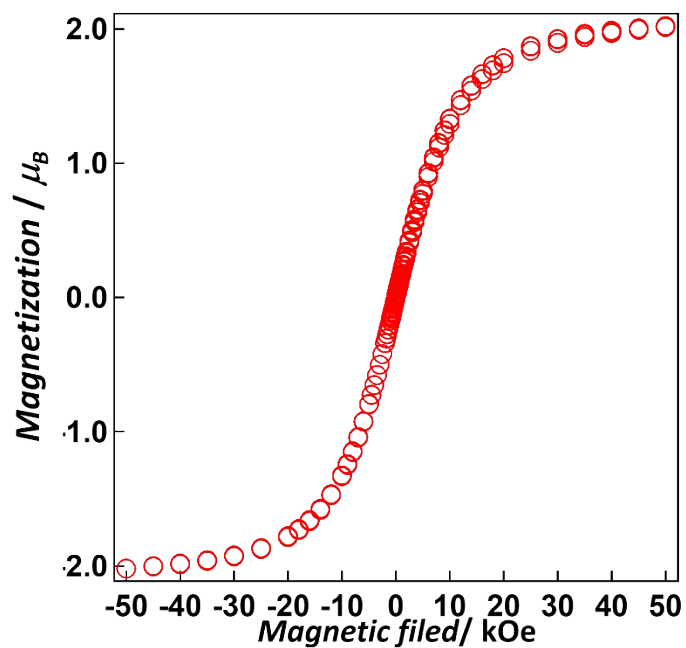

Figure S12.  $M$  versus  $H$  plots at 2 K for **1**

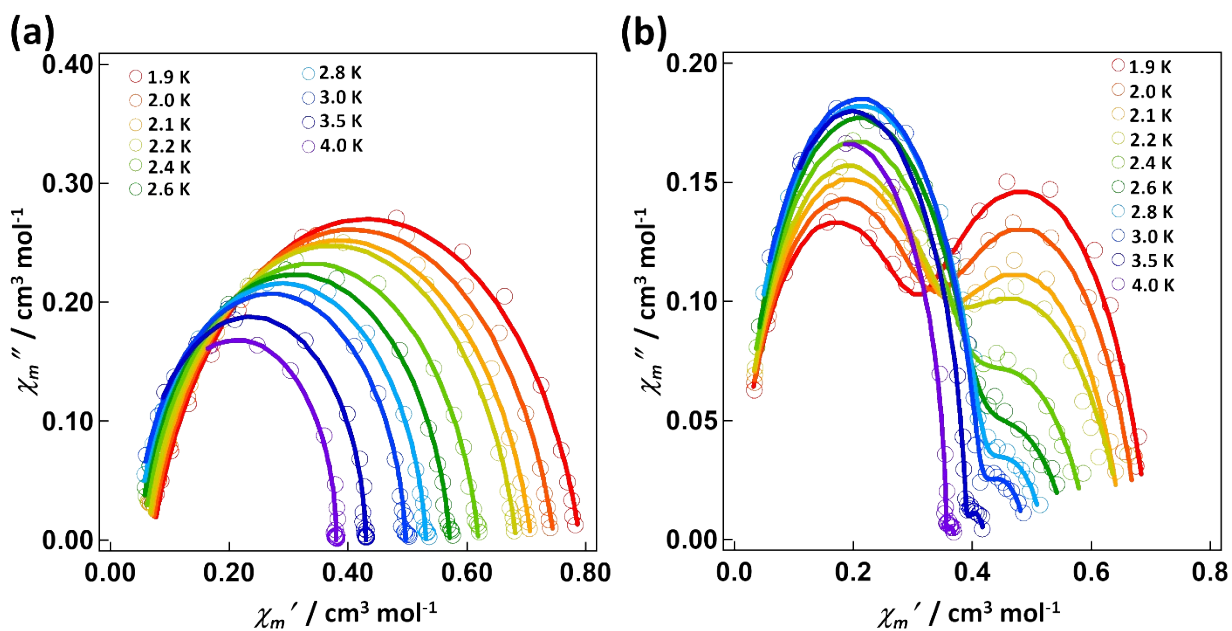

Figure S13. Cole-Cole plots for **1** under an applied dc field of (a) 1000 Oe and (b) 3000 Oe. Solid lines represent the best fits for the generalized Debye and two processes model

**Table S5.** Fitted parameters for the Cole-Cole plots for **1** under applied field of 1000 Oe as determined within the generated Debye model ( $\tau$  : magnetic relaxation time,  $\alpha$  : distribution of relaxation times).

| 1000 Oe |                       |                        |
|---------|-----------------------|------------------------|
| T (K)   | $\tau$ (s)            | $\alpha$               |
| 1.9     | $1.25 \times 10^{-2}$ | 0.181                  |
| 2.0     | $1.03 \times 10^{-2}$ | 0.165                  |
| 2.1     | $8.49 \times 10^{-3}$ | 0.156                  |
| 2.2     | $7.20 \times 10^{-3}$ | 0.145                  |
| 2.4     | $4.47 \times 10^{-3}$ | 0.124                  |
| 2.6     | $2.82 \times 10^{-3}$ | 0.0986                 |
| 2.8     | $1.78 \times 10^{-3}$ | 0.0748                 |
| 3.0     | $1.16 \times 10^{-3}$ | 0.0577                 |
| 3.5     | $4.58 \times 10^{-4}$ | 0.0204                 |
| 4.0     | $2.14 \times 10^{-4}$ | $1.02 \times 10^{-15}$ |

**Table S6.** Fitted parameters for the Cole-Cole plots for **1** under applied field of 3000 Oe as determined within the two processes Debye model ( $\tau$  : magnetic relaxation time,  $\alpha$  : distribution of relaxation times).

| 3000 Oe |                       |          |                       |                        |
|---------|-----------------------|----------|-----------------------|------------------------|
|         | Low frequency         |          | High frequency        |                        |
| T (K)   | $\tau$ (s)            | $\alpha$ | $\tau$ (s)            | $\alpha$               |
| 1.9     | $5.68 \times 10^{-2}$ | 0.228    | $8.08 \times 10^{-4}$ | 0.130                  |
| 2.0     | $5.41 \times 10^{-2}$ | 0.246    | $8.44 \times 10^{-4}$ | 0.130                  |
| 2.1     | $5.31 \times 10^{-2}$ | 0.271    | $8.47 \times 10^{-4}$ | 0.124                  |
| 2.2     | $4.86 \times 10^{-2}$ | 0.360    | $7.91 \times 10^{-4}$ | 0.0832                 |
| 2.4     | $5.67 \times 10^{-2}$ | 0.378    | $7.73 \times 10^{-4}$ | 0.0930                 |
| 2.6     | $6.87 \times 10^{-2}$ | 0.448    | $6.97 \times 10^{-4}$ | 0.0729                 |
| 2.8     | $1.08 \times 10^{-1}$ | 0.381    | $6.03 \times 10^{-4}$ | 0.0728                 |
| 3.0     | $1.34 \times 10^{-1}$ | 0.371    | $4.93 \times 10^{-4}$ | 0.0507                 |
| 3.5     | $1.87 \times 10^{-1}$ | 0.271    | $2.83 \times 10^{-4}$ | 0.0296                 |
| 4.0     | $2.00 \times 10^{-1}$ | 0.214    | $1.64 \times 10^{-4}$ | $1.02 \times 10^{-20}$ |

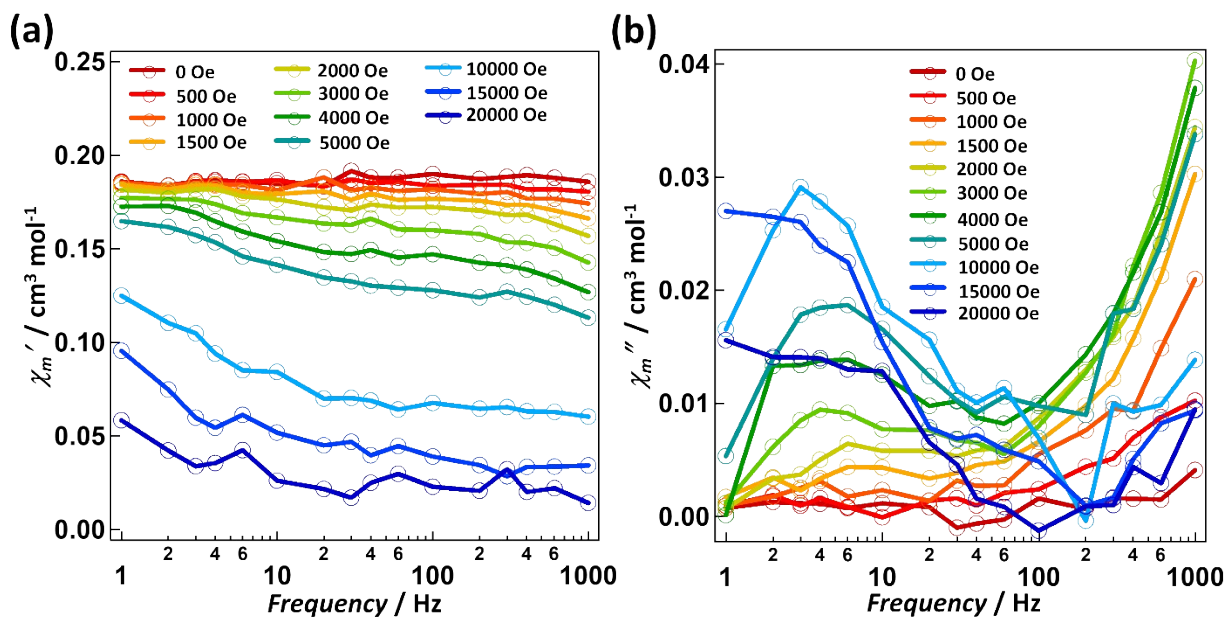

**Figure S14.** Variable-frequency AC magnetic susceptibility data of  $1 \cdot 1.5\text{MeOH}$  collected under an applied field bias from 0 to 20000 Oe. The solid lines serve as a guide for the eyes

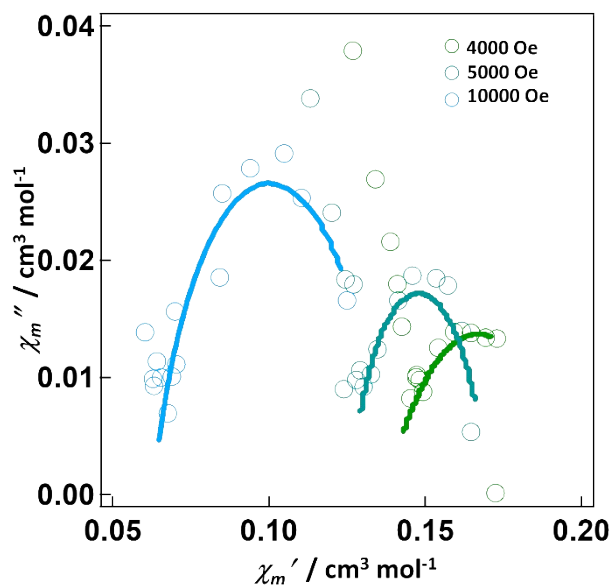

**Figure S15.** Cole-Cole plots for  $1 \cdot 1.5\text{MeOH}$  at 2 K. Solid lines represent the best fits for the generalized Debye processes model

**Table S7.** Fitted parameters for the Cole-Cole plots for **1**·1.5MeOH at 2 K as determined within the generated Debye model ( $\tau$ : magnetic relaxation time,  $\alpha$ : distribution of relaxation times).

| Field (Oe) | $\tau$ (s)            | $\alpha$ |
|------------|-----------------------|----------|
| 4000       | $5.15 \times 10^{-2}$ | 0.445    |
| 5000       | $2.62 \times 10^{-2}$ | 0.244    |
| 10000      | $4.71 \times 10^{-2}$ | 0.212    |
